# Supplementary material for: Highly fluorescent triazolopyridine–thiophene D–A–D oligomers for efficient pH sensing both in solution and in the solid state
Source: Royal Society of Chemistry journal article supplement (doi:10.1039/c9cp00672a), 2019-01-01
Supplement: c9cp00672a3.pdf [file c9cp00672a3.pdf]

Supporting Information for

**Highly fluorescent triazolopyridine-thiophene D-A-D oligomers for  
efficient pH sensing in both solution and solid state**

Nannan Jian<sup>a</sup>, Kai Qu<sup>a</sup>, Hua Gu<sup>a</sup>, Lie Zou<sup>a</sup>, Ximei Liu<sup>b</sup>, Faqi Hu<sup>b</sup>, Jingkun Xu<sup>a,b,\*</sup>,

Yan Yu<sup>c,\*</sup>, Baoyang Lu<sup>a,b,\*</sup>

*<sup>a</sup> School of Chemistry & Chemical Engineering, Jiangxi Science & Technology*

*Normal University, Nanchang 330013, Jiangxi, PR China;*

*<sup>b</sup> School of Pharmacy, Jiangxi Science & Technology Normal University, Nanchang*

*330013, Jiangxi, PR China;*

*<sup>c</sup> School of Optical and Electronic Information, Huazhong University of Science and*

*Technology, Wuhan 430074, Hubei, PR China.*

\*: Corresponding authors. Email: [lby1258@163.com](mailto:lby1258@163.com); [xujingkun1971@yeah.net](mailto:xujingkun1971@yeah.net); and

[yuyan19840218@hust.edu.cn](mailto:yuyan19840218@hust.edu.cn)

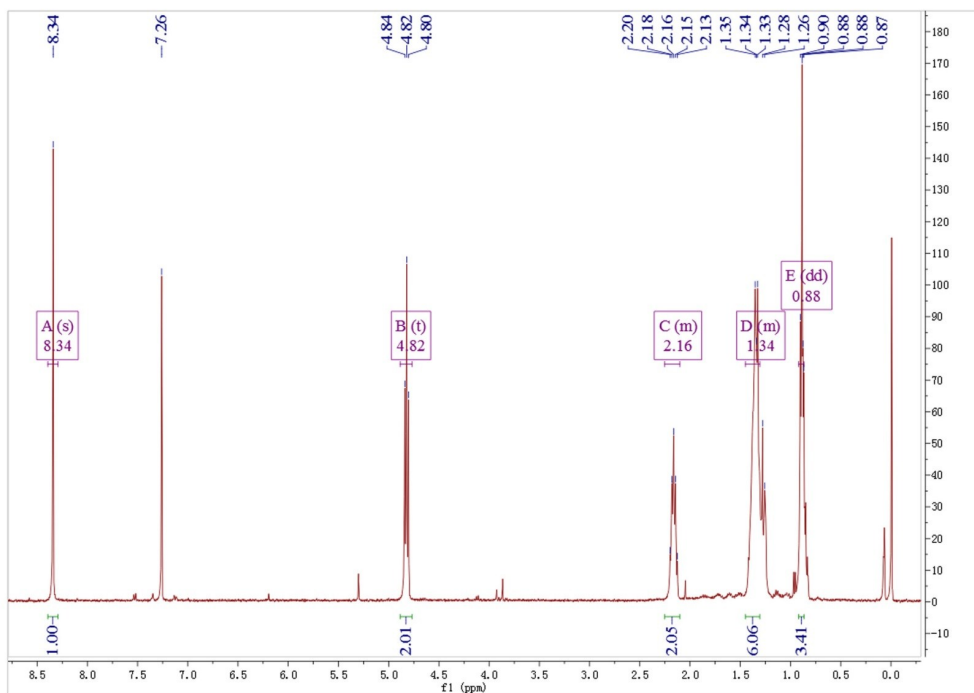

**Fig. S1**  $^1\text{H}$  NMR spectrum of 4,7-dibromo-hexyl[1,2,3]triazolo[4,5-c]pyridine (14a) in  $\text{CDCl}_3$ .

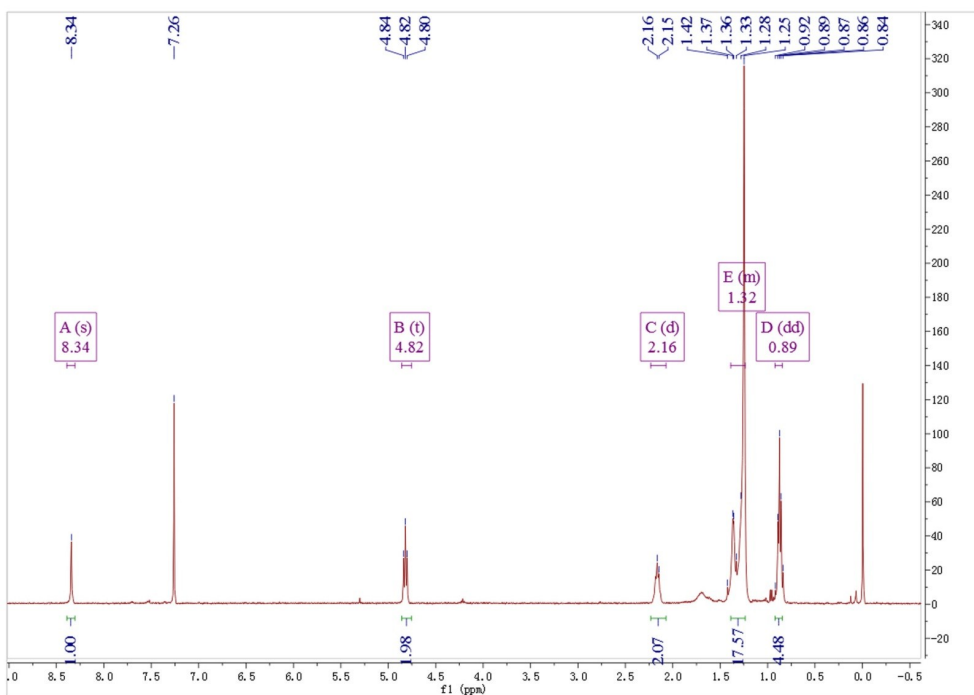

**Fig. S2**  $^1\text{H}$  NMR spectrum of 4,7-dibromo-dodecyl[1,2,3]triazolo[4,5-c]pyridine (14b) in  $\text{CDCl}_3$ .

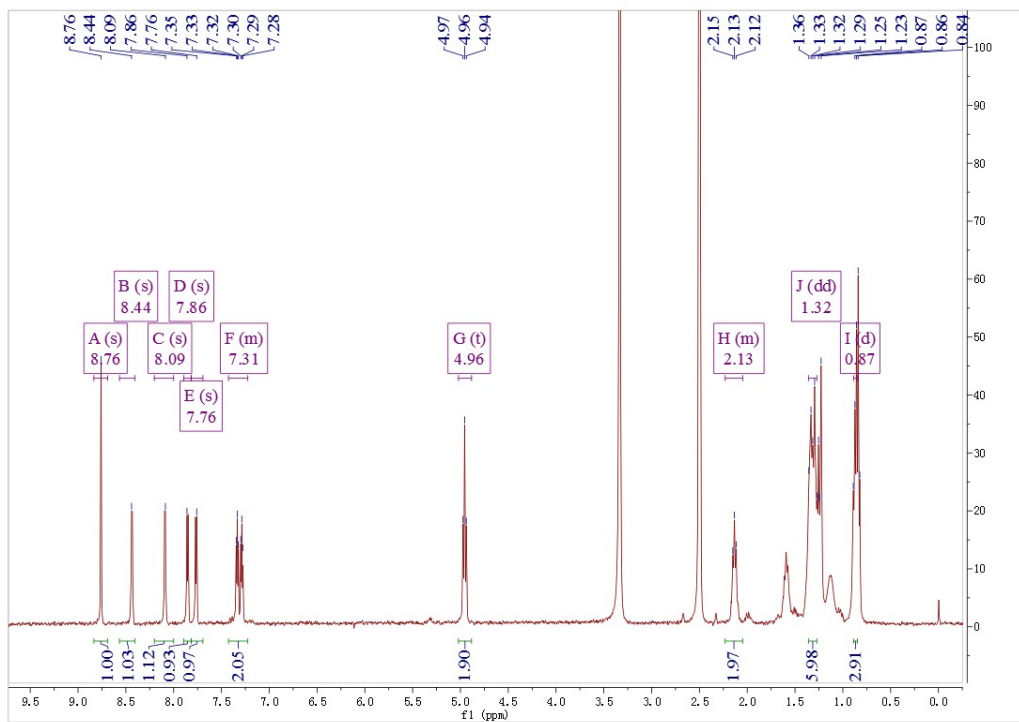

**Fig. S3**  $^1\text{H}$  NMR spectrum of Th-HPTz (**1**) in  $\text{DMSO-}d_6$ .

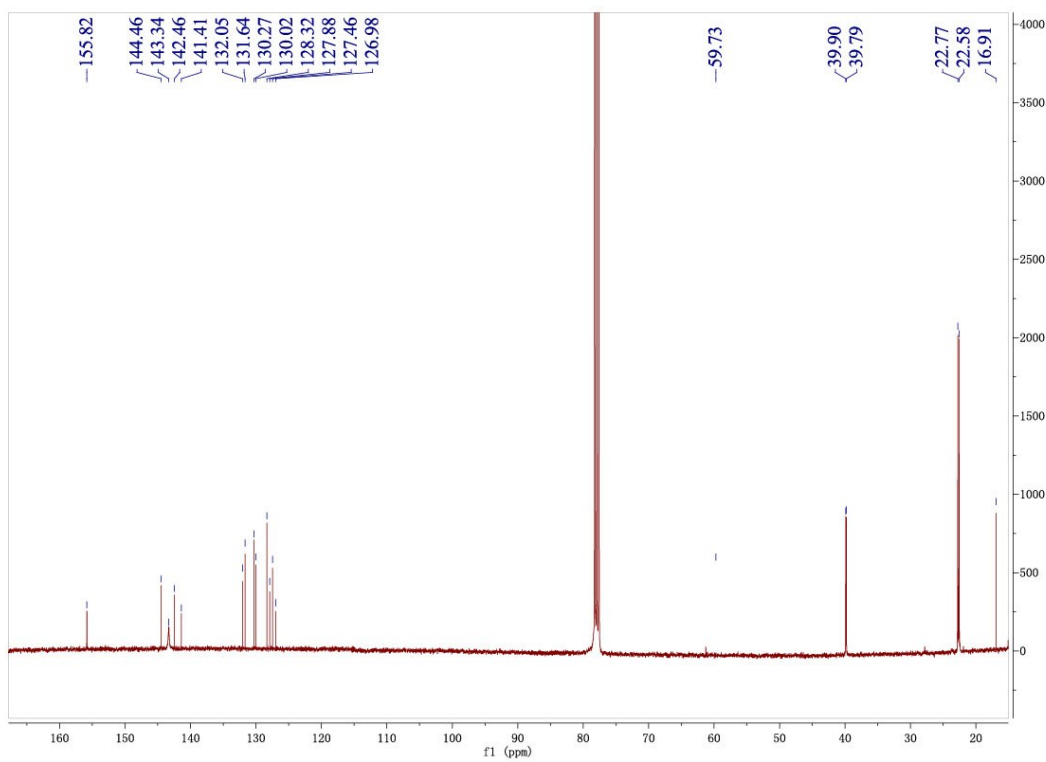

**Fig. S4**  $^{13}\text{C}$  NMR spectrum of Th-HPTz (**1**) in  $\text{CDCl}_3$ .

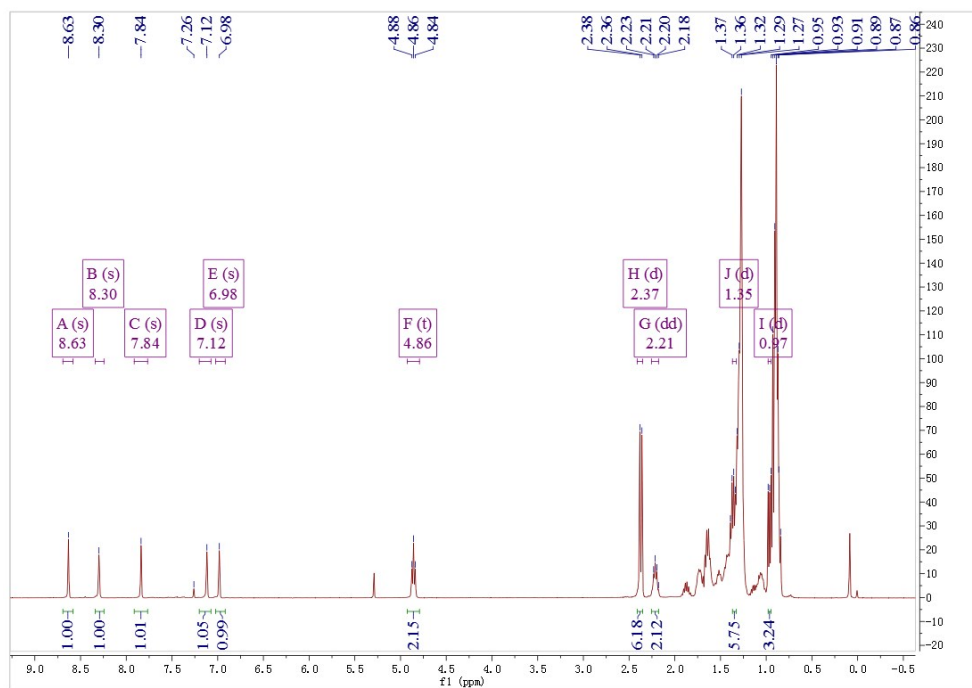

Fig. S5  $^1\text{H}$  NMR spectrum of 3MT-HPTz (**2**) in  $\text{CDCl}_3$ .

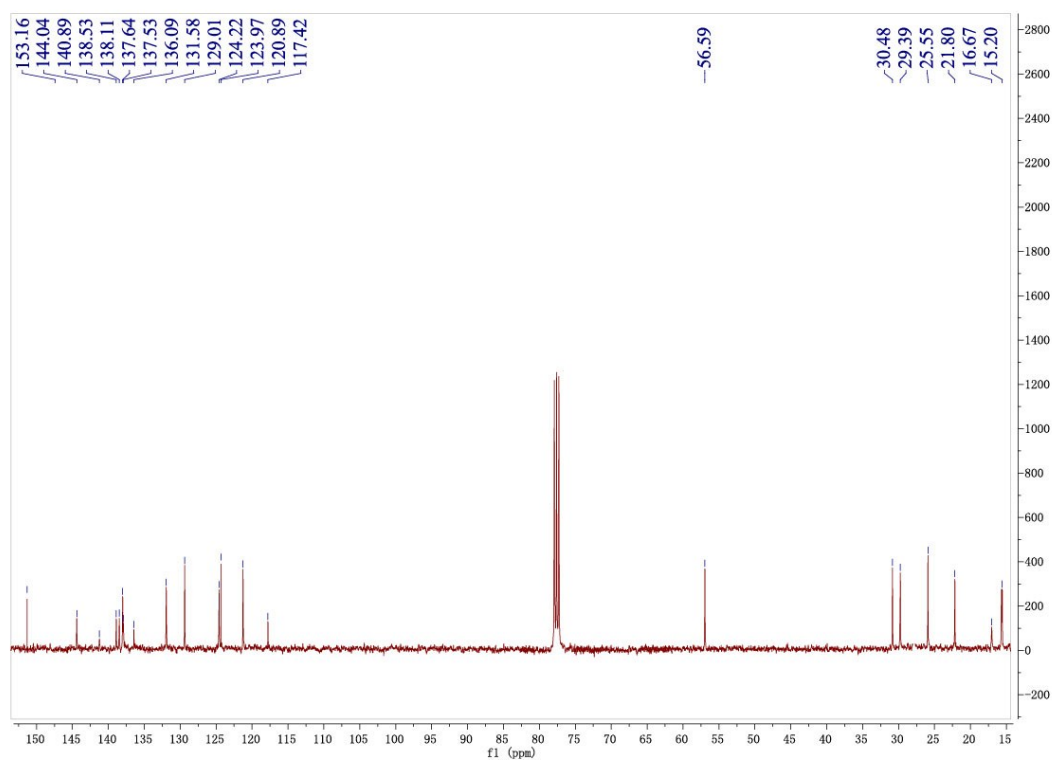

Fig. S6  $^{13}\text{C}$  NMR spectrum of 3MT-HPTz (**2**) in  $\text{CDCl}_3$ .

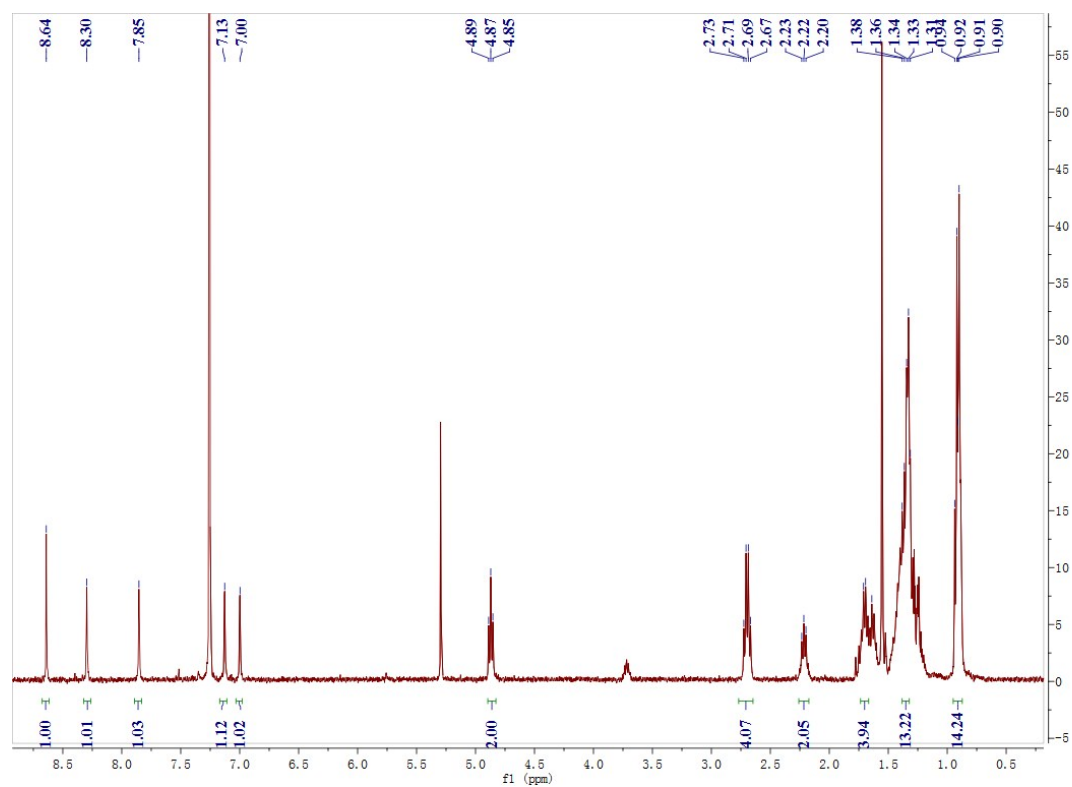

**Fig. S7**  $^1\text{H}$  NMR spectrum of 3HT-HPTz (**3**) in  $\text{CDCl}_3$ .

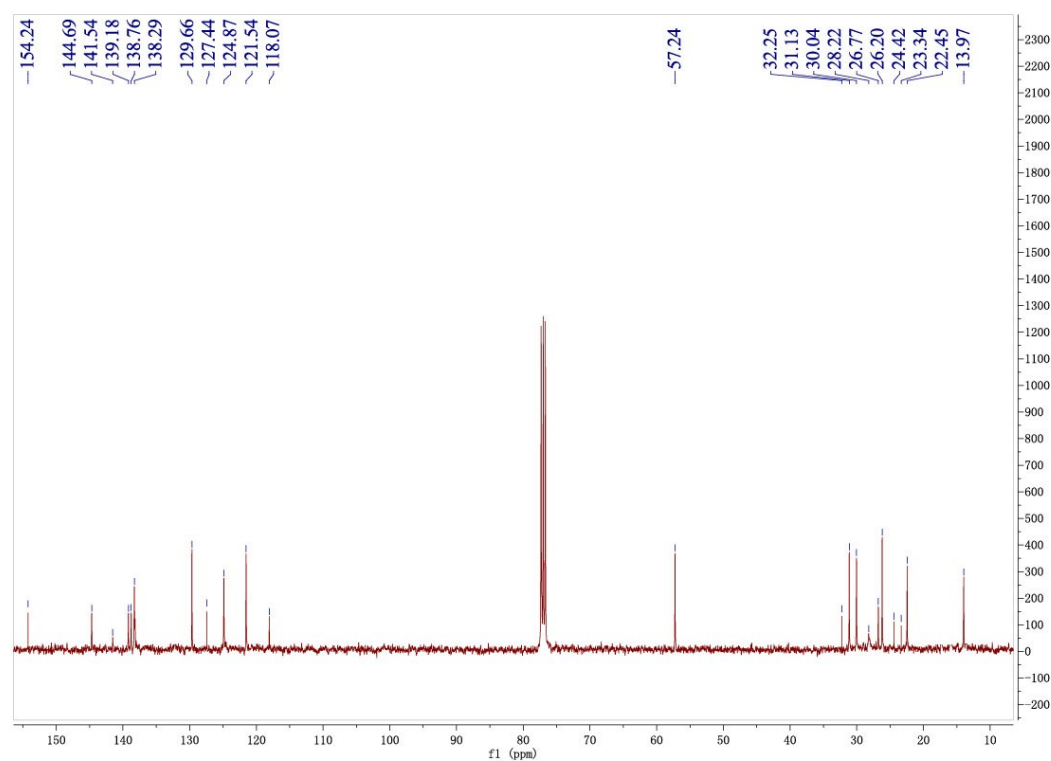

**Fig. S8**  $^{13}\text{C}$  NMR spectrum of 3HT-HPTz (**3**) in  $\text{CDCl}_3$ .

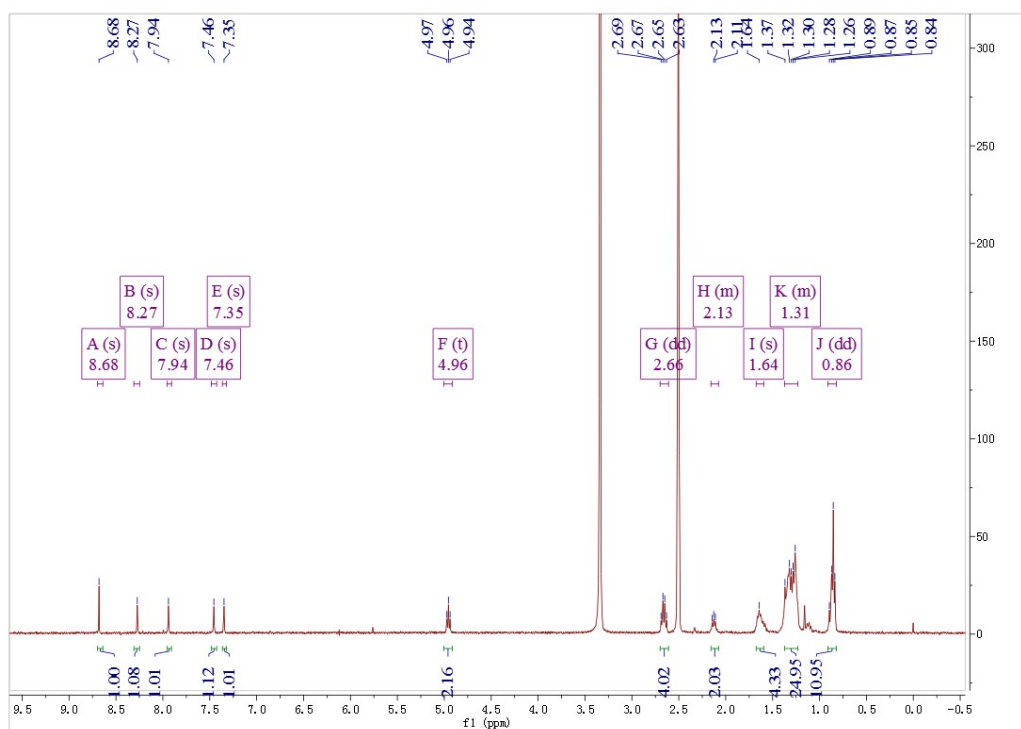

Fig. S9  $^1\text{H}$  NMR spectrum of 3OT-HPTz (**4**) in  $\text{DMSO-}d_6$ .

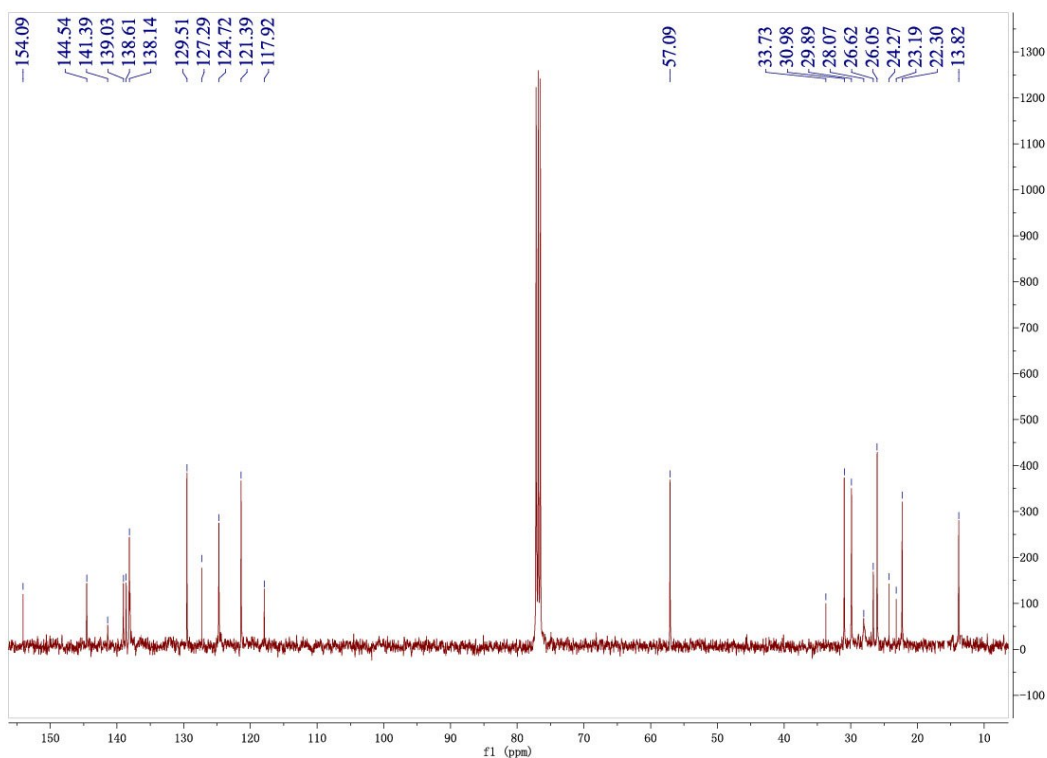

Fig. S10  $^{13}\text{C}$  NMR spectrum of 3OT-HPTz (**4**) in  $\text{CDCl}_3$ .

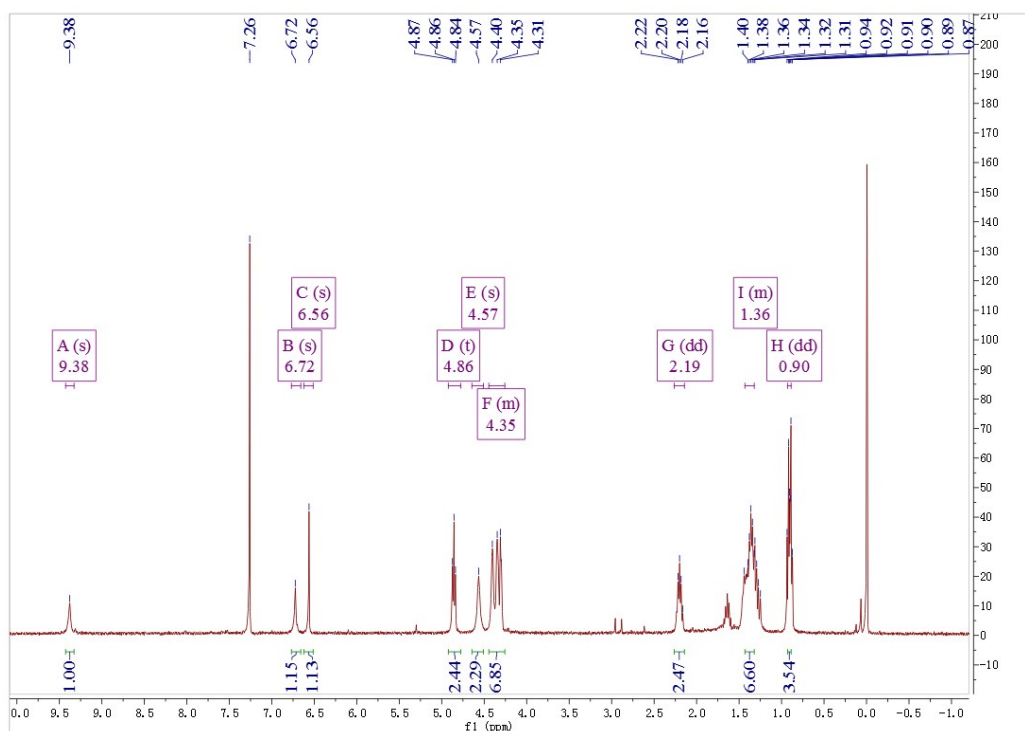

Fig. S11  $^1\text{H}$  NMR spectrum of EDOT-HPTz (**5**) in  $\text{CDCl}_3$ .

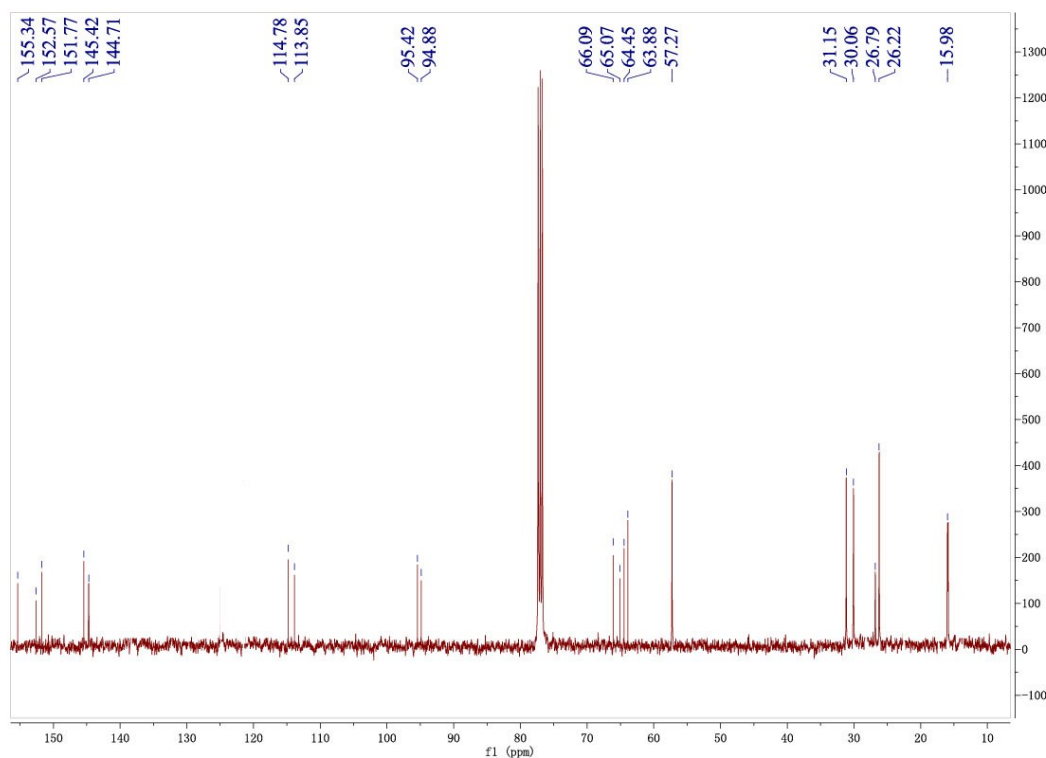

Fig. S12  $^{13}\text{C}$  NMR spectrum of EDOT-HPTz (**5**) in  $\text{CDCl}_3$ .

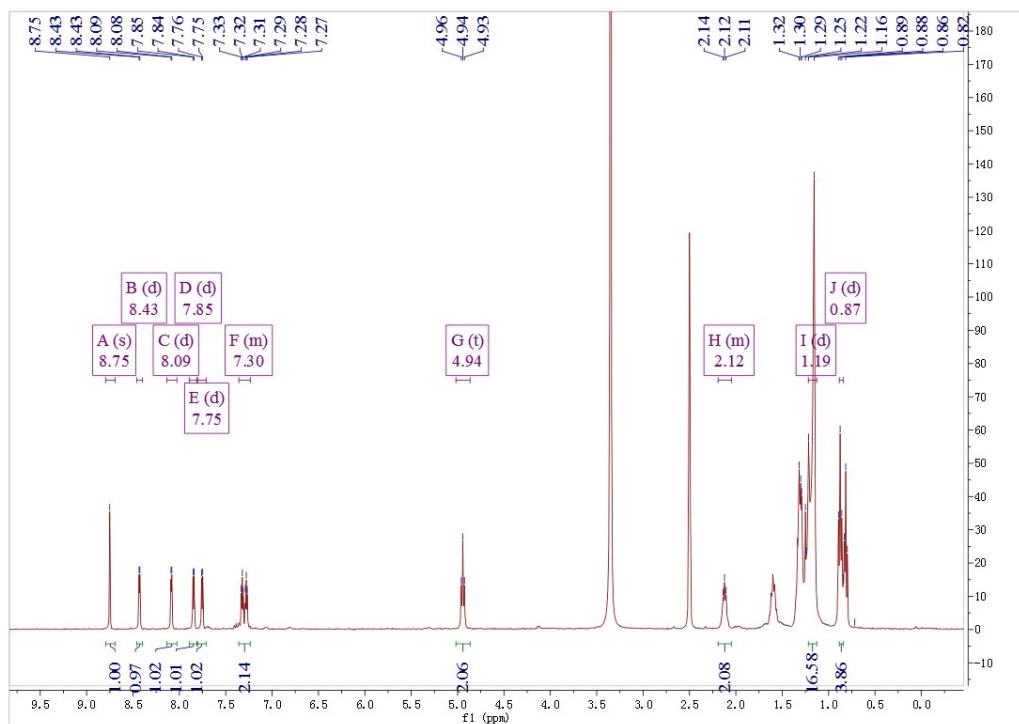

Fig. S13  $^1\text{H}$  NMR spectrum of Th-DPTz (**6**) in  $\text{DMSO-}d_6$ .

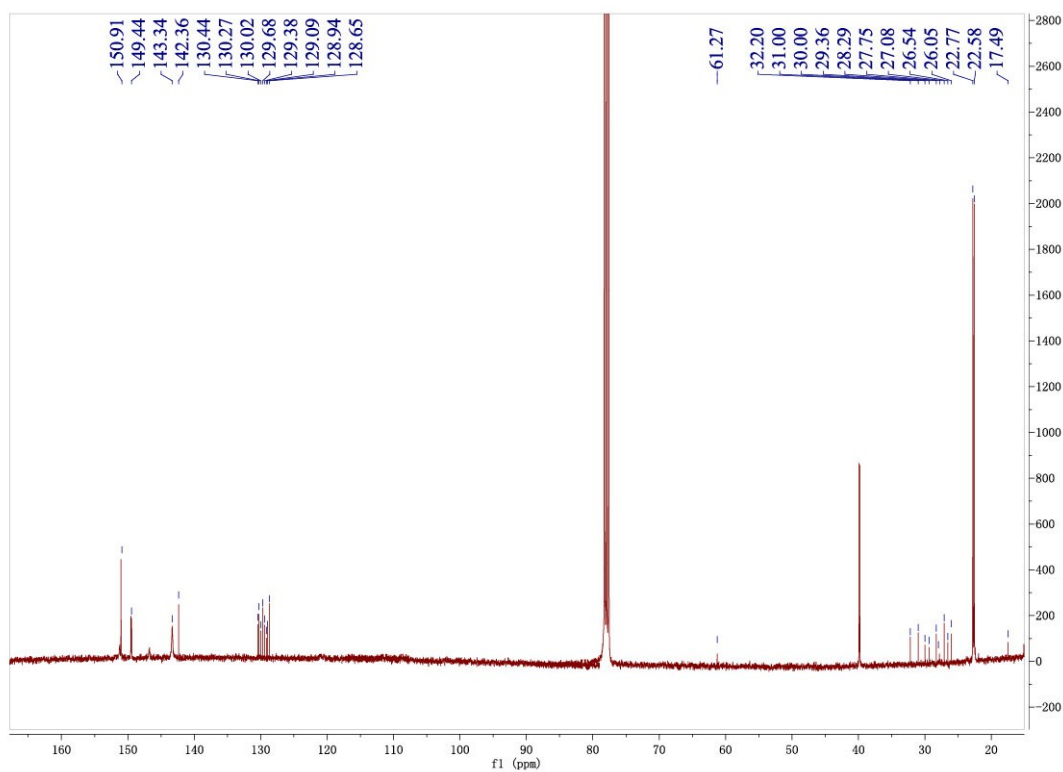

Fig. S14  $^{13}\text{C}$  NMR spectrum of Th-DPTz (**6**) in  $\text{CDCl}_3$ .



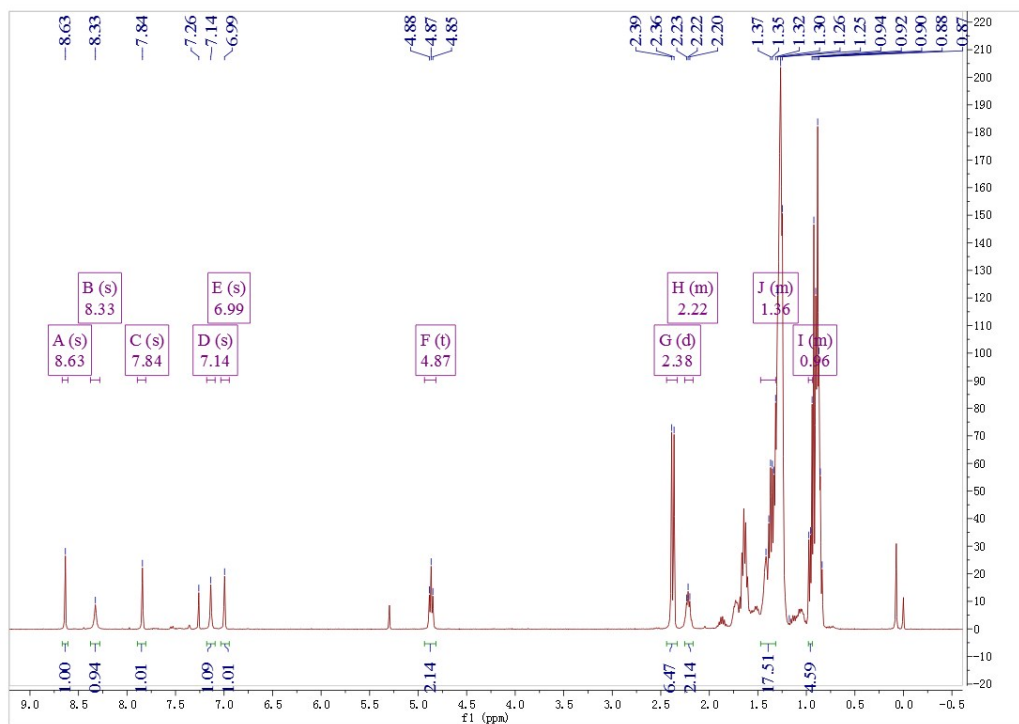

**Fig. S15**  $^1\text{H}$  NMR spectrum of 3MT-DPTz (**7**) in  $\text{CDCl}_3$ .

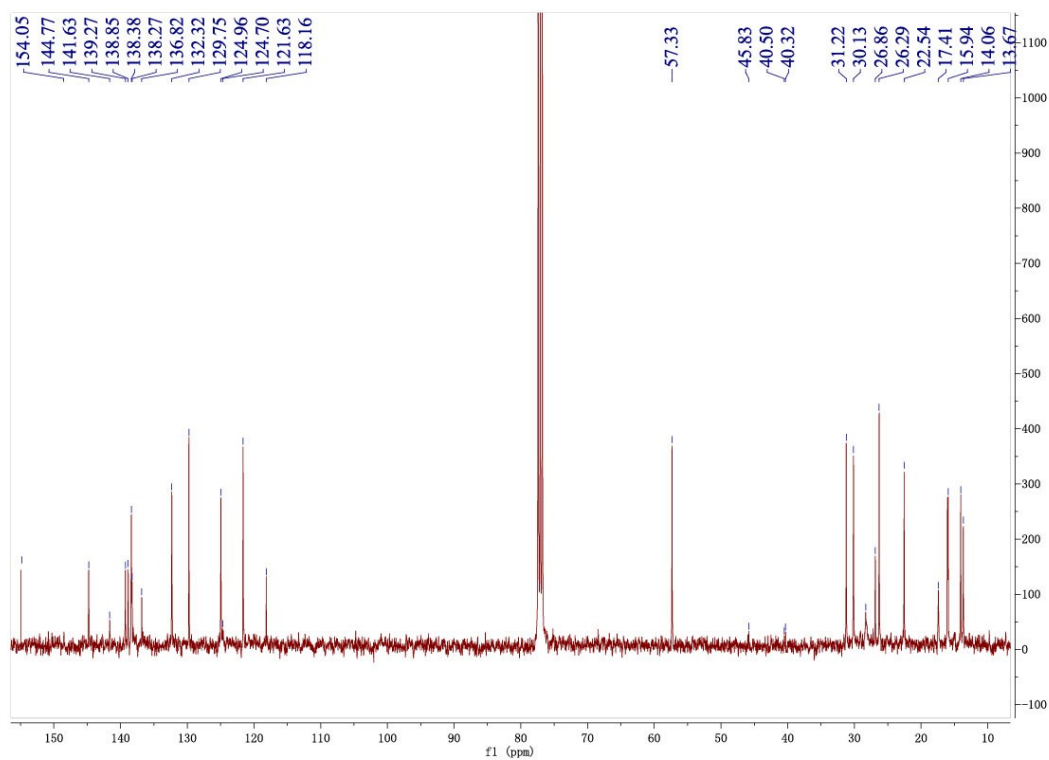

**Fig. S16**  $^{13}\text{C}$  NMR spectrum of 3MT-DPTz (**7**) in  $\text{CDCl}_3$ .

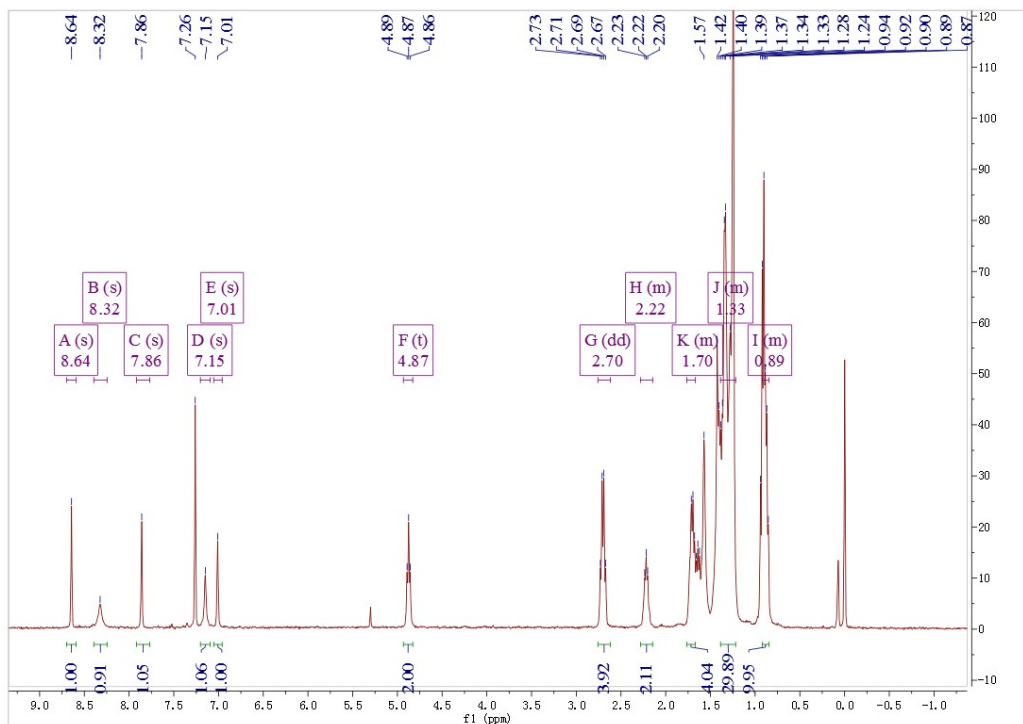

Fig. S17  $^1\text{H}$  NMR spectrum of 3HT-DPTz (**8**) in  $\text{CDCl}_3$ .

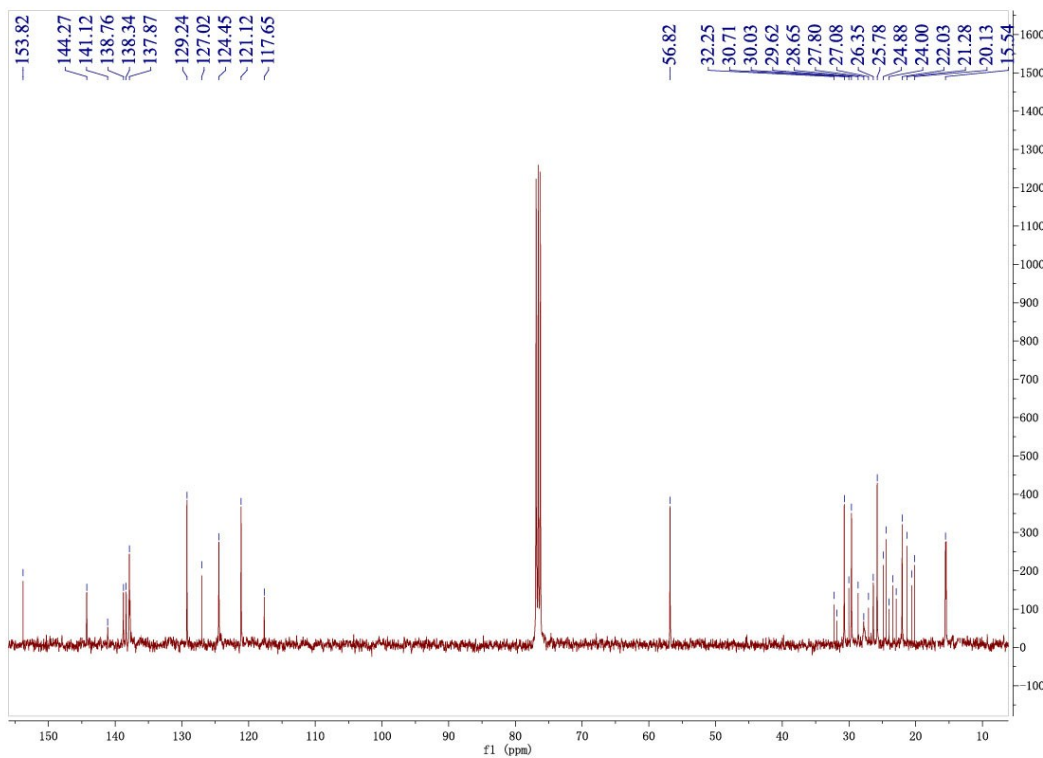

Fig. S18  $^{13}\text{C}$  NMR spectrum of 3HT-DPTz (**8**) in  $\text{CDCl}_3$ .

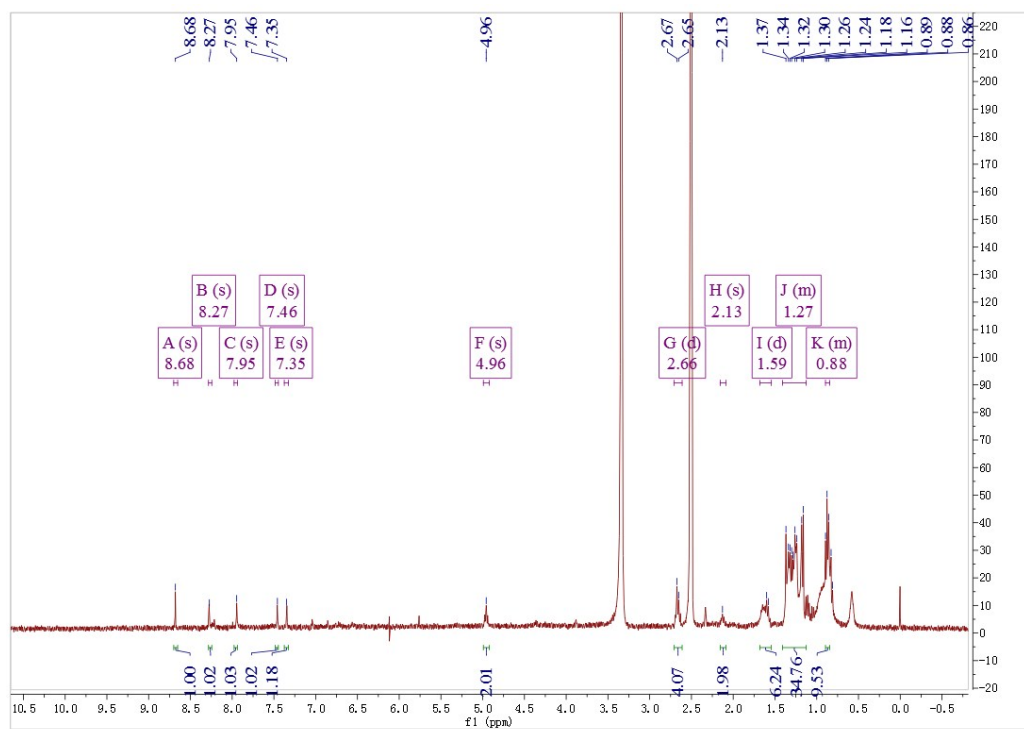

**Fig. S19**  $^1\text{H}$  NMR spectrum of 3OT-DPTz (**9**) in  $\text{DMSO-}d_6$ .

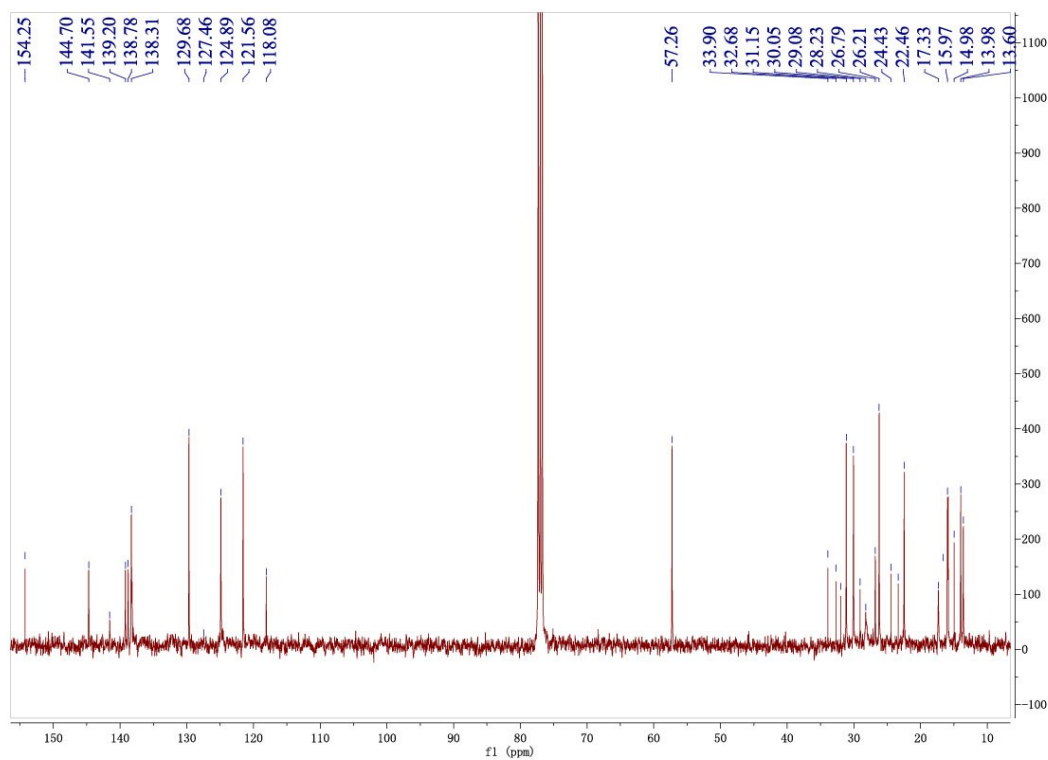

**Fig. S20**  $^{13}\text{C}$  NMR spectrum of 3OT-DPTz (**9**) in  $\text{CDCl}_3$ .

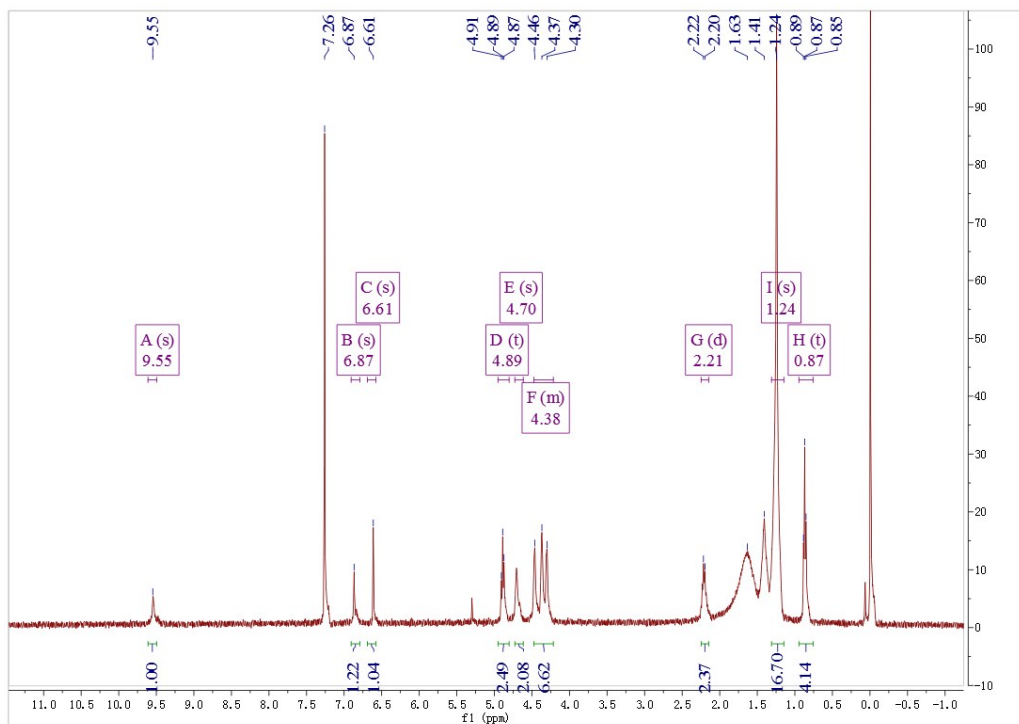

Fig. S21  $^1\text{H}$  NMR spectrum of EDOT-DPTz (**10**) in  $\text{CDCl}_3$ .

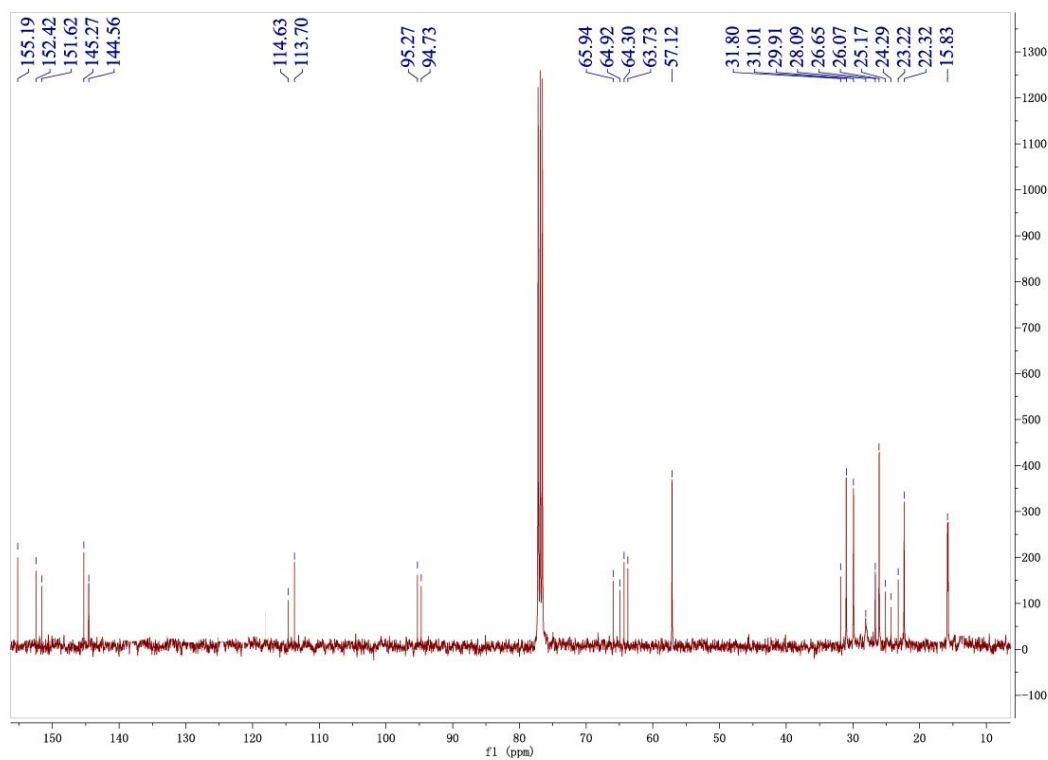

Fig. S22  $^{13}\text{C}$  NMR spectrum of EDOT-DPTz (**10**) in  $\text{CDCl}_3$ .

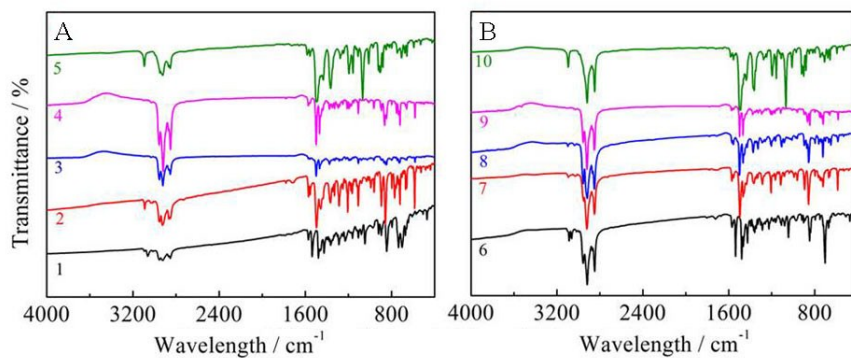

**Fig. S23** FT-IR spectra of triazolopyridine-thiophene D-A-D type conjugated fluorophores (1~10).

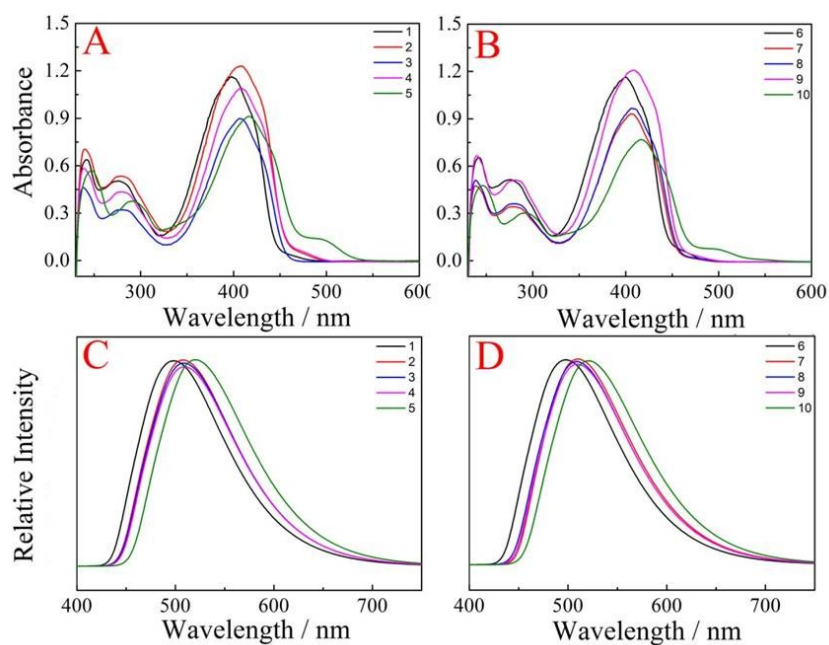

**Fig. S24** UV-Vis absorption (A and B) and emission spectra (C and D) of triazolopyridine-thiophene D-A-D type conjugated fluorophores (1~10) in DCM.

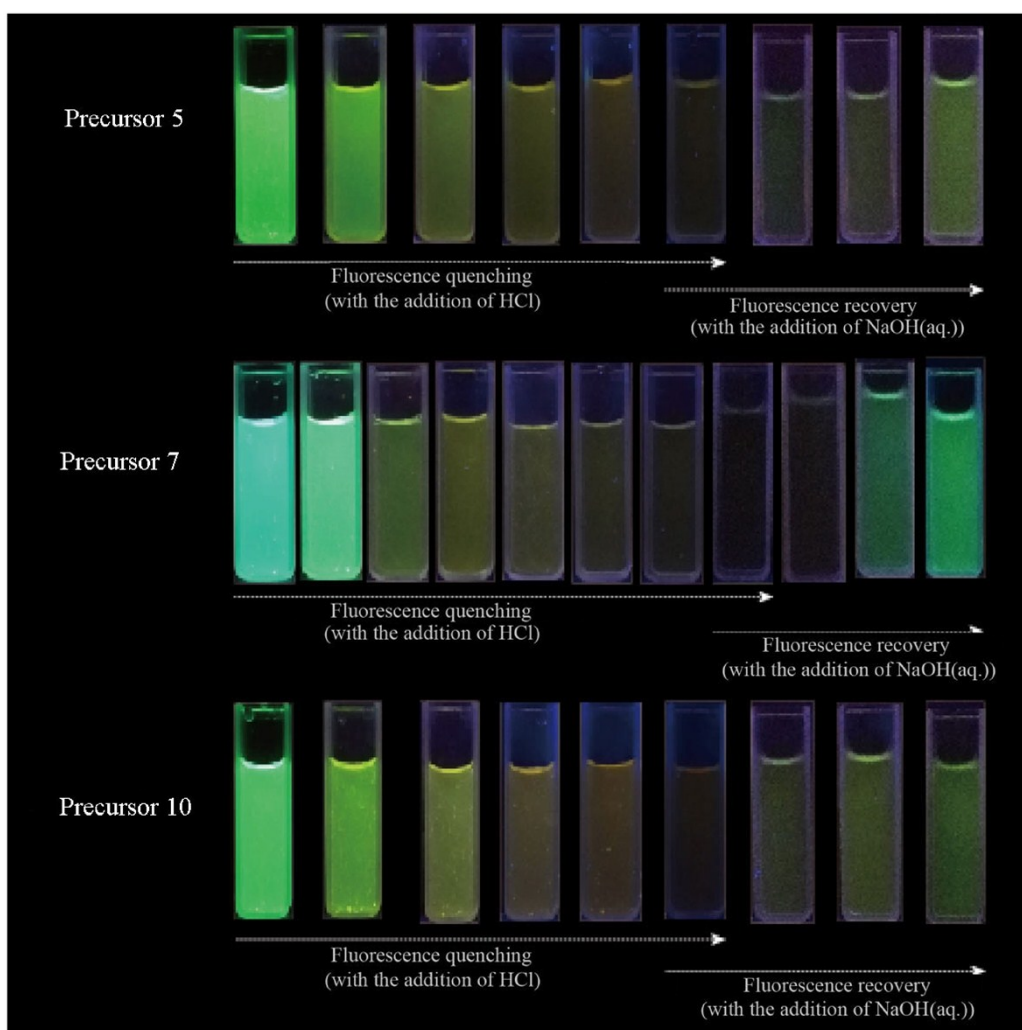

**Fig. S25** Images of fluorescence quenching/recovery of triazolopyridine-thiophene D-A-D type conjugated fluorophores 5, 7 and 10 upon addition of HCl and reversed by NaOH in water-DMSO.

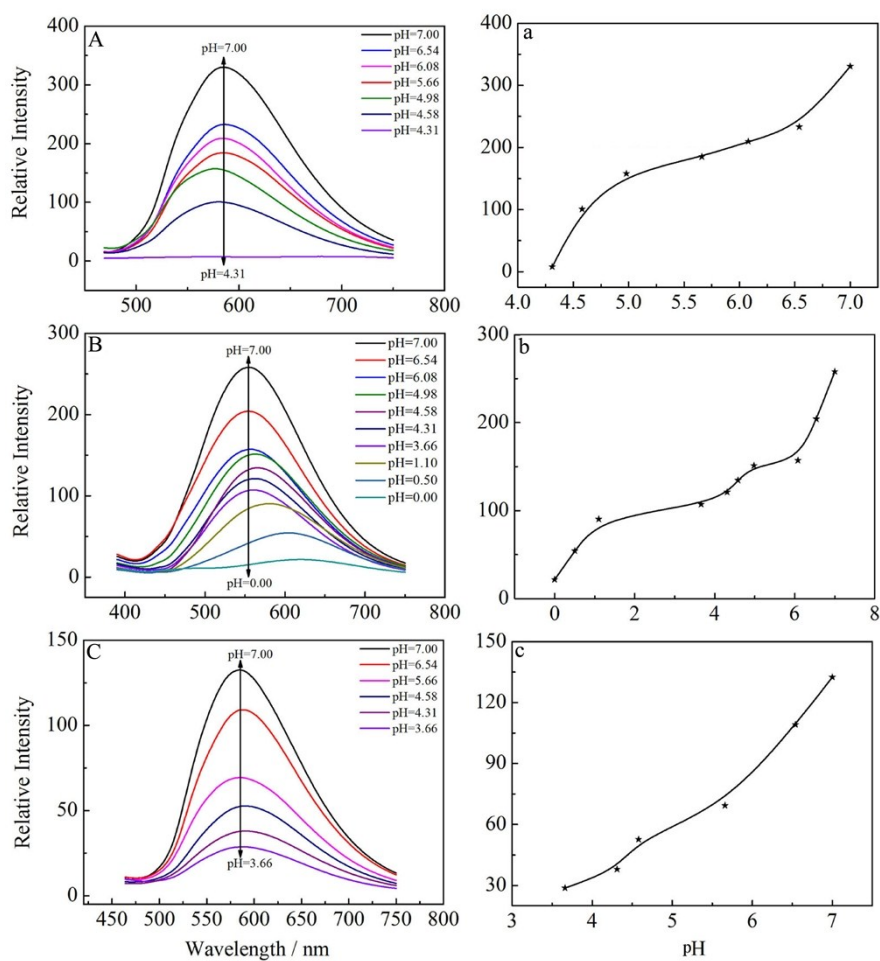

**Fig. S26.** (A-C) Fluorescence quenching in emission spectra of fluorophore 5, 7, and 10 (15  $\mu\text{M}$ ) by adding HCl. Excitation: 380 nm. (a-c) The corresponding calibration curve of  $I_{\text{max}}$ .

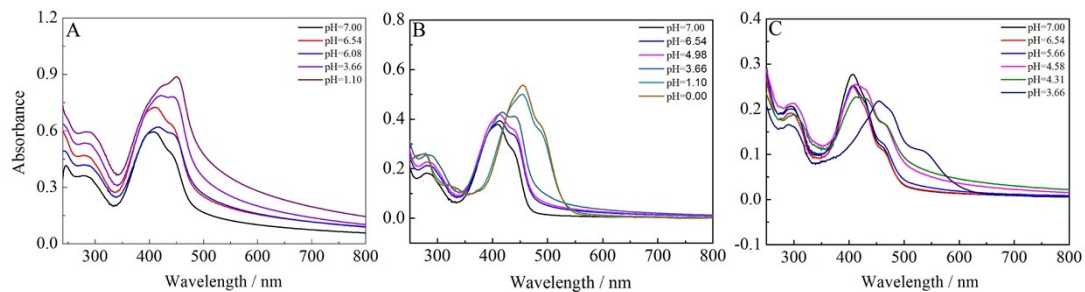

**Fig. S27.** The absorption spectral evolution of fluorophore 2 (A), 7 (B) and 10 (C) (15  $\mu\text{M}$ ).

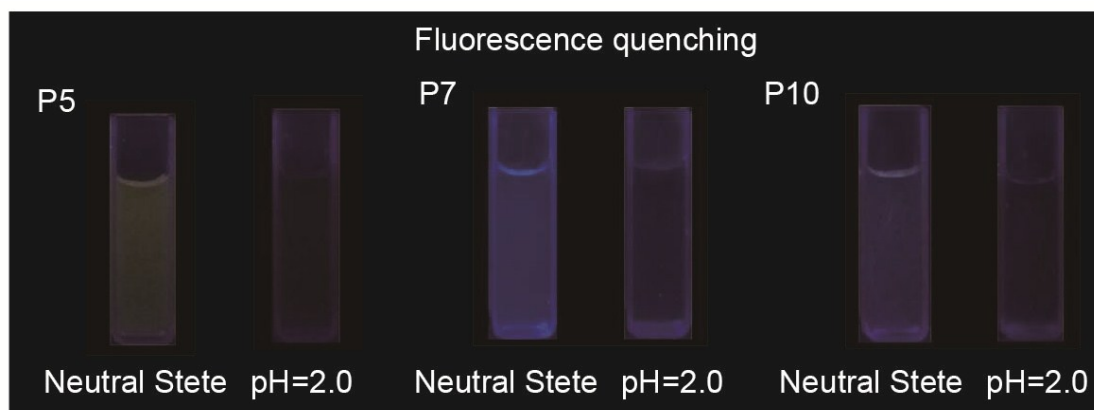

**Fig. S28** Fluorescence quenching of P5, P7 and P10 (15  $\mu$ M in repeat units) at the neutral state and pH 2.0.

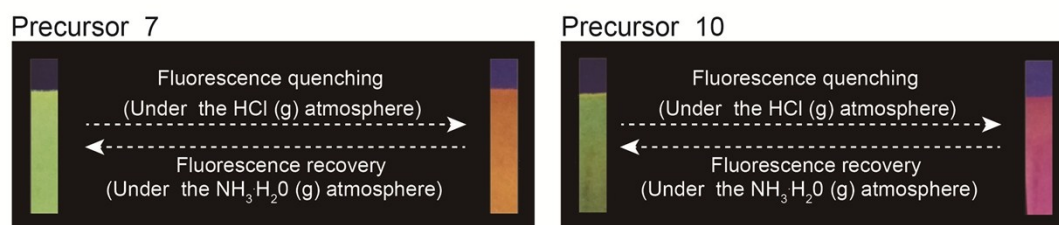

**Fig. S29** The digital imaging of fluorophores 7/10-based fluorescence test papers in the both of HCl and NH<sub>3</sub>·H<sub>2</sub>O vapor.



**Table S1** Peak assignments and comparison between observed peaks of triazolopyridine-thiophene D-A-D type conjugated fluorophores (1~10).

| Peak(cm <sup>-1</sup> )<br>1/2/3/4/5/6/7/8/9/10                                                                        | Assignment                                             |
|------------------------------------------------------------------------------------------------------------------------|--------------------------------------------------------|
| 3085/ 3087/ 3080/ 3091/ 3088/ 3092/ 3088/ 3087/ 3089/ 3087                                                             | =C-H vibration of thiophene                            |
| 2831, 2847/ 2927, 2853/ 2934, 2854/ 2930, 2849/ 2926, 2852/ 2820, 2846/ 2934, 2825/ 2921, 2845/ 2922, 2848/ 2929, 2850 | =C-H vibration of pyridine or triazole                 |
| 1587, 1550/ 1579, 1552/ 1581, 1549/ 1582, 1547/ 1580, 1548/ 1581, 1550/ 1580, 1557/ 1584, 1557/ 1585, 1552/ 1579, 1549 | ring vibration of substituted pyridine                 |
| 1491/ 1489/ 1493/ 1492/ 1495/ 1491/ 1493/ 1492/ 1492/ 1490                                                             | C=C vibration of pyridine or C=N vibration of triazole |
| 1362/ 1365/ 1368/ 1360/ 1364/ 1369/ 1368/ 1367/ 1362/ 1360                                                             | ring vibration of substituted thiophene                |
| 1201, 1150/ 1195, 1151/ 1221, 1154/ 1204, 1150/ 1197, 1155/ 1195, 1147/ 1195, 1153/ 1195, 1158/ 1197, 1159/ 1198, 1152 | =C-H in-plane of thiophene                             |
| 1071/ 1072/ 1058/ 1056/ 1070/ 1067/ 1062/ 1059/ 1057/ 1069                                                             | =C-H out-of-plane of pyridine or triazole              |
| 711/ 713/ 698/ 697/ 701/ 705/ 695/ 691/ 701/ 703                                                                       | =C-H out-of-plane of thiophene                         |

**Table S2** DFT calculated molecular geometries and frontier molecular orbital distributions for the model structures.

| Monomers           | 1                                                                                   | 2                                                                                   | 3                                                                                   | 4                                                                                    | 5                                                                                     |
|--------------------|-------------------------------------------------------------------------------------|-------------------------------------------------------------------------------------|-------------------------------------------------------------------------------------|--------------------------------------------------------------------------------------|---------------------------------------------------------------------------------------|
| Optimized geometry | 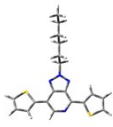   |    |    |    |    |
| LUMO               |    |    |    |    |    |
| HOMO               |    |    |    |    |    |
| Monomers           | 6                                                                                   | 7                                                                                   | 8                                                                                   | 9                                                                                    | 10                                                                                    |
| Optimized geometry |  |  |  |  |  |
| LUMO               |  |  |  |  |  |
| HOMO               |  |  |  |  |  |

**Table S3** Optical parameters and DFT theoretical calculation data of previously reported chalcogenodiazolo[3,4-c]pyridine-based molecular systems.

| Precursors                   | $E_{\text{HOMO}}$<br>(eV) | $E_{\text{LUMO}}$<br>(eV) | $\lambda_{\text{onset}}$<br>(nm) | $E_{\text{g,opt}}$<br>(eV) | $\lambda_{\text{max,1}}$<br>(nm) | $\lambda_{\text{max,2}}$<br>(nm) | $\lambda_{\text{max,3}}$<br>(nm) | $\lambda_{\text{em}}$<br>(nm) | $\phi_{\text{F}}$ | Ref.    |
|------------------------------|---------------------------|---------------------------|----------------------------------|----------------------------|----------------------------------|----------------------------------|----------------------------------|-------------------------------|-------------------|---------|
| ProDOT(Me) <sub>2</sub> -PT  | -5.93                     | -3.88                     | 563                              | 2.20                       | 263                              | 309                              | 481                              | 661                           | 0.602             | [23]    |
| ProDOT(Me) <sub>2</sub> -PSe | -5.86                     | -4.16                     | 604                              | 2.05                       | 268                              | 321                              | 518                              | 673                           | 0.137             | [23]    |
| ProDOT(Bu) <sub>2</sub> -PT  | -5.81                     | -3.97                     | 565                              | 2.19                       | 264                              | 311                              | 485                              | 721                           | 0.477             | [23]    |
| ProDOT(Bu) <sub>2</sub> -PSe | -5.77                     | -3.97                     | 702                              | 1.77                       | 270                              | 325                              | 526                              | 715                           | 0.088             | [23]    |
| EDOT-PT                      | -5.68                     | -3.54                     | 579                              | 2.14                       | 266                              | 315                              | 500                              | 653                           | 0.501             | [22,25] |
| EDOT-PSe                     | -5.61                     | -3.67                     | 639                              | 1.94                       | 274                              | 328                              | 542                              | 714                           | 0.072             | [25]    |
| HexTh-PT                     | -5.95                     | -3.71                     | 554                              | 2.24                       | 255                              | 307                              | 479                              | 618                           | 0.711             | [25]    |
| HexTh-PSe                    | -5.85                     | -3.80                     | 605                              | 2.05                       | 252                              | 317                              | 515                              | 648                           | 0.184             | [25]    |
| MeTh-PT                      | -5.81                     | -3.56                     | 551                              | 2.25                       | 256                              | 305                              | 476                              | 615                           | 0.701             | [25]    |
| MeTh-PTSe                    | -5.80                     | -3.74                     | 602                              | 2.06                       | 253                              | 316                              | 502                              | 613                           | 0.200             | [25]    |
| Th-PT                        | -6.04                     | -3.73                     | 537                              | 2.31                       | 258                              | 302                              | 464                              | 603                           | 0.849             | [25]    |
| Th-PSe                       | -5.90                     | -3.59                     | 582                              | 2.13                       | 270                              | 313                              | 498                              | 643                           | 0.307             | [25]    |
